# Supplementary material for: Utility of Saxagliptin in the Treatment of Type 2 Diabetes: Review of Efficacy and Safety
Source: PubMed Central journal article supplement — Adv Ther. 2015 Nov 17;32(11):1065–84. doi: 10.1007/s12325-015-0262-9 (PMC4662714; doi:10.1007/s12325-015-0262-9), 2015-11-17
Supplement: 12325_2015_262_MOESM1_ESM.pdf [file 12325_2015_262_MOESM1_ESM.pdf]

- Saxagliptin as monotherapy or as add-on therapy significantly improves glycemic control in patients with type 2 diabetes.
- The overall adverse event profile of saxagliptin is similar to that of placebo, with a low rate of hypoglycemia and weight neutrality.
- Saxagliptin is effective and well tolerated in older patients and in patients with cardiovascular disease or cardiovascular risk factors.
- In a large cardiovascular outcomes trial, saxagliptin did not increase or decrease cardiovascular events, but the rate of hospitalization for heart failure was increased.
- Results from ongoing cardiovascular outcomes trials with other dipeptidyl peptidase-4 inhibitors may provide additional data on how best to manage patients with type 2 diabetes who are also at risk for heart failure.

This summary slide represents the opinions of the authors. The article processing charges and open access fee for this publication were funded by AstraZeneca LP (Wilmington, DE). Medical writing support was provided by Richard Edwards, PhD, and Janet Matsuura, PhD (Complete Healthcare Communications, Inc., Chadds Ford, PA) and was funded by AstraZeneca LP. For a full list of acknowledgments and disclosures for all authors of this article, please see the full text online. © The Author(s) 2015. Creative Commons Attribution Noncommercial License (CC BY-NC).
